# Supplementary material
Source: publisher figshare collection journal article supplement (https://gsapubs.figshare.com/articles/dataset/_/12540011)
Supplement: Supplementary file 1 [file 1]

DR Item 2018346 to accompany Johnston, S.M., Kylander-Clark, A.R.C., and Chapman, A.D., 2018, Detrital zircon geochronology and evolution of the Nacimiento block late Mesozoic forearc basin, central California coast, *in* Ingersoll, R.V., Lawton, T.F., and Graham, S.A., eds., *Tectonics, Sedimentary Basins, and Provenance: A Celebration of William R. Dickinson's Career*: Geological Society of America Special Paper 540, [https://doi.org/10.1130/2018.2540\(17\)](https://doi.org/10.1130/2018.2540(17)).

**Appendix DR1:** notes, reference lists, and samples used to create source strata detrital zircon composite probability density plots in Figure 6 and Figure 8.

---

**Figure 6 notes, reference lists, and samples.**

Jurassic composite:

- 1) Jr foreland basin deposits
  - Dickinson et al., 2008a: Morrison Formation (CP13, CP19, CP21, CP25, CP29, CP35, CP36, CP41, CP49, CP52).
- 2) Jr arc-flank and rift deposits:
  - Dickinson and Gehrels, 2009: Mt Wrightson Formation (CP2).
  - Dickinson, et al., 2009: Cintura Formation of the Bisbee Group (KBCR).
  - Barth, et al., 2004: basal McCoy Mountains Formation (MC7, MC9).
  - Reis, J.H., 2009: Slumgullion Formation (KE10, KE10A, KE44, KE42, KE37).
  - Mauel et al., 2011: Morita and Cucurpe Formations (DM9-4-3, DM-1-6-8).
- 3) Lower–Middle Jr eolianites and associated fluvial deposits
  - Dickinson and Gehrels, 2009: San Rafael Group (CP15, CP16, CP54, CP12, CP43, CP45, Jenw, CP24), Glen Canyon Group (CP30, CP37, CP10, Jnnw, CP3, CP1, Jwnw, CP31, DOL).

Triassic composite:

- 1) Triassic miogeocline overlap sediments
  - Dickinson and Gehrels, 2008b: Chinle Formation and equivalents (CP17, CP26, CP42, CP44, CP47, CP48, CP5, CP50, CP6, Currie, TRU).
  - Dickinson and Gehrels, 2008b: Chinle and Moenkopi Formation southern feeder rivers (CP11, CP18, CP20, CP38, CP8).

Upper Paleozoic composite:

- 1) Mississippian–Permian shelf sediments
  - Gehrels and Dickinson, 2011: Grand Canyon stratigraphy (Surprise Canyon 1, 2, 3, Watahomigi, Manacacha, Wescogame, Esplanade 1, 2, 3, Lower Hermit, Hermit, Upper Hermit, Coconino1, 2, Toroweap 1, 2, Kaibab 1, 2).

Lower Paleozoic composite:

- 1) Cambrian–Devonian shelf sediments
  - Gehrels et al., 2011: Grand Canyon stratigraphy (Tapeats 1, 2, Lower Bright Angel, Bright Angel, Upper Bright Angel, Temple Butte 1, 2, 3).

Paleozoic allochthons

- 1) Golconda allochthon
  - Riley, et al., 2000: Schoonover Q, Schoonover V, Jory Fm., Pumpernickel Fm.
- 2) Roberts Mountain allochthon
  - Gehrels and Dickinson, 1995: Harmony Fm., Valmy Fm.
  - Gehrels, et al., 2000: Harmony LC#2, Harmony LC#3, Harmony LC#4, Harmony Elbow Canyon, Harmony (Harmony Canyon), Harmony Hot Springs, Lower Vini,

Lower Vin #2, Upper Vini, McAfee Quartzite, Snow Canyon Formation, Elder Sandstone, Slavern Chert.

Neoproterozoic–Cambrian outer shelf

1) White–Inyo Range sediments

- Chapman, et al., 2015: Poleta Formation (12WI1), Harkless Formation (12WI2), Deep Springs Formation (12WI3), Wyman Formation (12WI4, 12WI5, WM208, WM170), Reed Dolomite (12WI6), Campito Formation (11IY1, 568, WM611, WM101).

Neoproterozoic inner shelf

1) Death Valley sequence: Because some parts of the section were more heavily sampled in the Mahon, one or two representative samples from each formation were chosen from this dataset in order to avoid dilution of undersampled sections in the composite probability density function.

- Schoenborn, et al., 2012: Stirling Quartzite (NR9, NR30), Johnnie Formation (J39A, J14A).
- Mahon et al., 2014: Noonday Dolomite (2CD11, 4CD13), Kingston Peak (4RM11), Beck Springs Dolomite (11RMSS5) Horse Thief Springs Formation (5CD11, 12RMSS6, 12RMSS5), Crystal Spring Formation (K03DV04).

**Figure 8 notes, reference lists, and samples.**

All data sets were filtered for zircon >300 Ma for the construction of these plots.

1) Blue Mountains:

- LaMaskin, et al., 2011: Snowshoe Fm. (06135), Lonesome Fm. (07016, IZEE7, IZEE9).

2) Sacramento Valley

- Surpless, et al., 2002: Stony Creek petrofacies at Cache Creek (GV64).
- Surpless, et al., 2006: Stony Creek petrofacies (JC14, JC12, JC20, JC17, JC18, JC19, KDS108).

3) Peninsular Ranges:

- Kimbrough, et al., 2014: Eugenia Fm. (V0510, V0520), Peñasquito Fm. (LUSARDICYN).

4) Basal McCoy Mountains:

- Barth, et al., 2004: McCoy Mountains Fm. (MC7, MC9).

5) Lower Gravelly Flat:

- Martin and Clemens-Knott, 2015: Gravelly Flat Formation (GVG103).

6) Colorado Plateau Jurassic composite:

- Dickinson and Gehrels, 2008a: Morrison Formation (CP13, CP19, CP21, CP25, CP29, CP35, CP36, CP41, CP49, CP52).
- Dickinson and Gehrels, 2009: Mt Wrightson Formation (CP2).
- Dickinson, et al., 2009: Cintura Formation of the Bisbee Group (KBCR).
- Barth, et al., 2004: basal McCoy Mountains Formation (MC7, MC9).
- Reis, J.H., 2009: Slumgullion Formation (KE10, KE10A, KE44, KE42, KE37).
- Mauel et al., 2011: Morita and Cucurpe Formations (DM9-4-3, DM-1-6-8).

- Dickinson and Gehrels, 2009: San Rafael Group (CP15, CP16, CP54, CP12, CP43, CP45, Jenw, CP24), Glen Canyon Group (CP30, CP37, CP10, Jnnw, CP3, CP1, Jwnw, CP31, DOL).
- 7) Neoproterozoic inner shelf composite: Because some parts of the section were more heavily sampled in the Mahon, one or two representative samples from each formation were chosen from this dataset in order to avoid dilution of undersampled sections in the composite cumulative probability plot.
- Schoenborn, et al., 2012: Stirling Quartzite (NR9, NR30), Johnnie Formation (J39A, J14A).
  - Mahon et al., 2014: Noonday Dolomite (2CD11, 4CD13), Kingston Peak (4RM11), Beck Springs Dolomite (11RMSS5) Horse Thief Springs Formation (5CD11, 12RMSS6, 12RMSS5), Crystal Spring Formation (K03DV04).

## References

- Barth, A.P., Wooden, J.L., Jacobson, C.E., Probst, K., 2004. U-Pb geochronology and geochemistry of the McCoy Mountains Formation, southeastern California: A Cretaceous retroarc foreland basin. *Geologic Society of America Bulletin* 116, 142–153.
- Chapman, A.D., Ernst, W.G., Gottlieb, E., Powerman, V., Metzger, E.P., 2015. Detrital zircon geochronology of Neoproterozoic–Lower Cambrian passive-margin strata of the White-Inyo Range, east-central California: Implications for the Mojave–Snow Lake fault hypothesis. *Geological Society of America Bulletin* doi: 10.1130/B31142.1.
- Dickinson, W.R., Gehrels, G., 2009. U-Pb ages of detrital zircons in Jurassic eolian and associated sandstones of the Colorado Plateau: Evidence for transcontinental dispersal and intraregional recycling of sediment. *Geological Society of America Bulletin* 121, 408–433, doi: 10.1130/B26406.1.
- Dickinson, W.R., Gehrels, G.E., 2008a. Sediment delivery to the Cordilleran foreland basin: Insights from U-Pb ages of detrital zircons in Upper Jurassic and Cretaceous strata of the Colorado Plateau. *American Journal of Science* 308, 1041–1082.
- Dickinson, W.R., Gehrels, G.E., 2008b. U-Pb ages of detrital zircons in relation to paleogeography: Triassic paleodrainage networks and sediment dispersal across southwest Laurentia. *Journal of Sedimentary Research* 78, 745–764.
- Dickinson, W.R., Lawton, T.F., Gehrels, G.E., 2009. Recycling detrital zircons: A case study from the Cretaceous Bisbee Group of southern Arizona. *Geology* 37, 503–506.
- Gehrels, G., Dickinson, W.R., 1995. Detrital zircon provenance of Cambrian to Triassic miogeoclinal and eugeoclinal strata in Nevada. *American Journal of Science* 295, 18–48.
- Gehrels, G.E., Blakey, R., Karlstrom, K.E., Timmons, J.M., Dickinson, W.R., Pecha, M., 2011. Detrital zircon U-Pb geochronology of Paleozoic strata in the Grand Canyon, Arizona. *Lithosphere* 3, 183–200.
- Gehrels, G.E., Dickinson, W.R., Riley, B.C.D., Finney, S.C., Smith, M.T., 2000. Detrital zircon geochronology of the Roberts Mountains allochthon, Nevada, in: Soreghan, M.J., Gehrels, G.E. (Eds.), *Paleozoic and Triassic Paleogeography and Tectonics of Western Nevada and Northern California*, Geological Society of America Special Paper 347. pp. 19–42.
- Kimbrough, D.L., Abbott, P.L., Balch, D.C., Bartling, S.H., Grove, M., Mahoney, J.B., 2014. Upper Jurassic Peñasquitos Formation—Forearc basin western wall rock of the

- Peninsular Ranges batholith, in: *Peninsular Ranges Batholith, Baja California and Southern California*, Geological Society of America Memoir. pp. 625–643.
- LaMaskin, T.A., Vervoort, J.D., Dorsey, R.J., Wright, J.E., 2011. Early Mesozoic paleogeography and tectonic evolution of the western United States: Insights from detrital zircon U-Pb geochronology, Blue Mountains Province, northeastern Oregon. *Geological Society of America Bulletin* 123, 1939–1965.
- Mahon, R.C., Dehler, C.M., Link, P.K., Karlstrom, K.E., 2014. Detrital zircon provenance and paleogeography of the Pahrump Group and overlying strata, Death Valley, California. *Precambrian Research* 251, 102–117.
- Martin, M.W., Clemens-Knott, D., 2015. Detrital-zircon record of the early Mesozoic southwestern Sierra Nevada arc preserved in Lower Cretaceous intra-arc and forearc deposits of central California, USA, in: Anderson, T.H., Didenko, A.N., Johnon, C.L., Khanchuk, A.I., MacDonald, J.H., Jr. (Eds.), *Late Jurassic Margin of Laurasia—A Record of Faulting Accommodating Plate Rotation*: Geological Society of America Special Paper 513. p. 269–284.
- Mauel, D.J., Lawton, T.F., Gonzalez-Leon, C., Iriondo, A., Amato, J.M., 2011. Stratigraphy and age of Upper Jurassic strata in north-central Sonora, Mexico: Southwestern Laurentian record of crustal extension and tectonic transition. *Geological Society of America Bulletin* 7, 390–414.
- Reis, J.H., 2009. Jurassic and Cretaceous tectonic evolution of the southeast Castle Dome Mountains, southwest Arizona (M.S. thesis). Iowa State University.
- Riley, B.C.D., Snyder, W.S., Gehrels, G., 2000. U-Pb detrital geochronology of the Golconda allochthon, Nevada, in: Soreghan, M.J., Gehrels, G. (Eds.), *Paleozoic and Triassic Paleogeography and Tectonics of Western Nevada and Northern California*. Geological Society of America Special Paper 347, pp. 65–76.
- Schoenborn, W.A., Fedo, C.M., Farmer, G.L., 2012. Provenance of the Neoproterozoic Johnnie Formation and Stirling Quartzite, southeastern California, determined by detrital zircon geochronology and Nd isotope geochemistry. *Precambrian Research* 206–207, 182–199.
- Surpless, K.D., Graham, S.A., Covault, J.A., Wooden, J.L., 2006. Does the Great Valley Group contain Jurassic strata? Reevaluation of the age and early evolution of a classic forearc basin. *Geology* 34, 21–24.
- Surpless, K.D., Graham, S.A., Wooden, J.L., McWilliams, M., 2002. Detrital zircon provenance analysis of the Great Valley Group, California: Evolution of an arc-forearc system. *Geological Society of America Bulletin* 114, 1564–1580.

Figure DR1. U–Pb isotope and age data from zircons extracted from granitic conglomerate clast SR-p3.

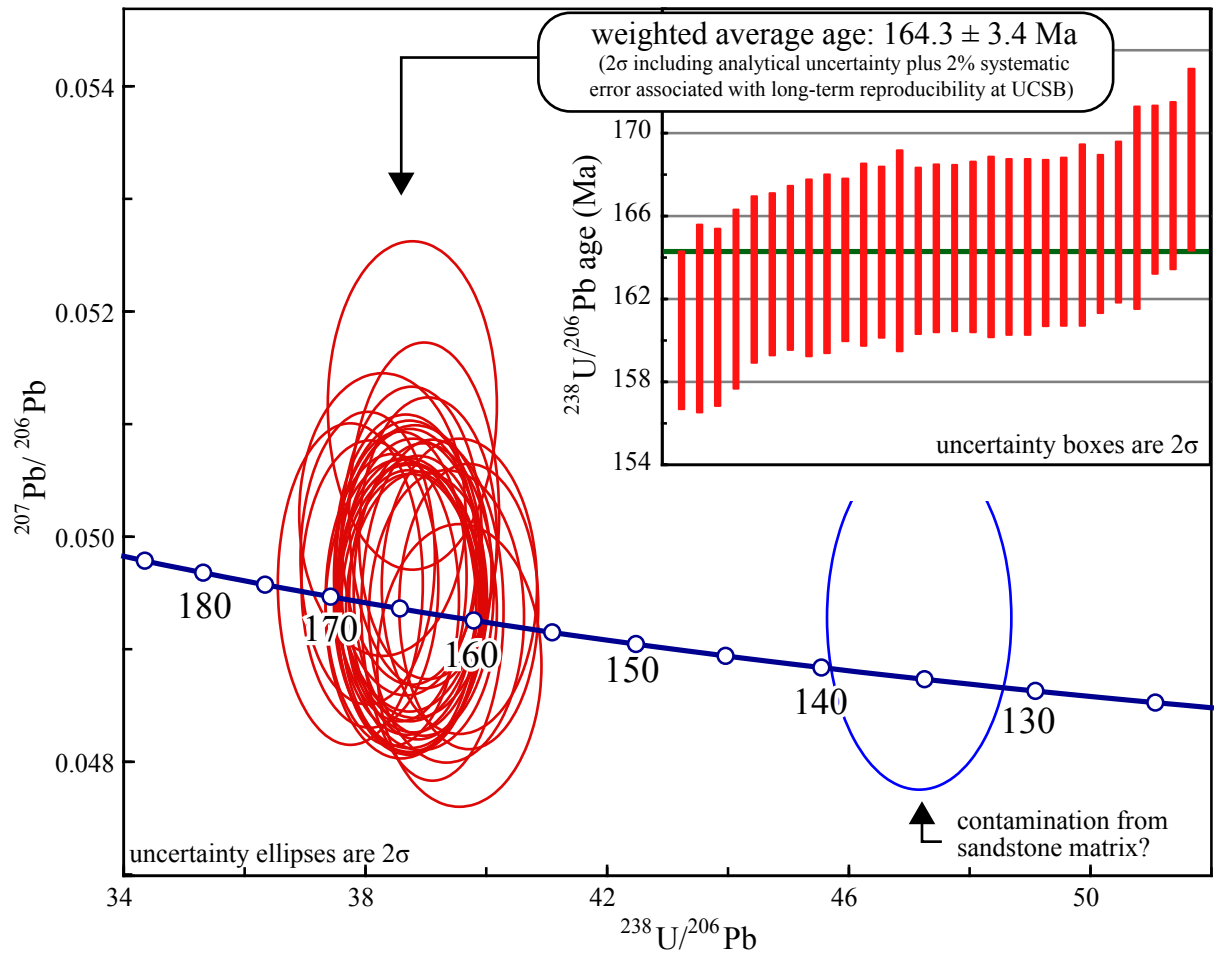

Table DR1: Nacimiento sandstone zircon-U-Pb

Table DR2: Nacimiento conglomerate-U-Pb

**DR Item 2018346** to accompany Johnston, S.M., Kylander-Clark, A.R.C., and Chapman, A.D., 2018, Detrital zircon geochronology and evolution of the Nacimiento block late Mesozoic forearc basin, central California coast, in Ingersoll, R.V., Lawton, T.F., and Graham, S.A., eds., *Tectonics, Sedimentary Basins, and Provenance: A Celebration of William R. Dickinson's Career*: Geological Society of America Special Paper 540, [https://doi.org/10.1130/2018.2540\(17\)](https://doi.org/10.1130/2018.2540(17)).

Table DR3: Sandstone petrographic data from Nacimeinto forearc sandstones.

| Sample | Age | Detrital Grain Counts |    |    |    |    |     |    |    |    |     |     |     |    |     |     |     |     |     | QtFL modes |      |      | Ratios |       |
|--------|-----|-----------------------|----|----|----|----|-----|----|----|----|-----|-----|-----|----|-----|-----|-----|-----|-----|------------|------|------|--------|-------|
|        |     | Kfs                   | Pl | Qm | Qc | Lq | Lv  | Lm | Ls | Mi | Mtx | Cal | Opq | Ep | Zrn | Cpx | Anm | Alt | Tot | Tc         | Qt   | F    | L      | P/F   |
| CA-A4  | 151 | 0                     | 22 | 32 | 2  | 9  | 65  | 19 | 0  | 4  | 12  | 41  | 1   |    |     |     |     |     | 207 | 154        | 28.9 | 14.8 | 56.4   | 100.0 |
| CA-A3  | 149 | 4                     | 15 | 17 | 14 | 24 | 62  | 26 | 7  | 3  | 28  | 0   | 0   |    |     |     |     |     | 200 | 172        | 32.5 | 11.2 | 56.2   | 78.9  |
| DF-A   | 140 | 0                     | 21 | 15 | 23 | 9  | 92  | 30 | 5  | 2  | 6   |     |     |    |     |     |     |     | 203 | 197        | 24.1 | 10.8 | 65.1   | 100.0 |
| SR-13C | 140 | 0                     | 11 | 24 | 13 | 4  | 71  | 24 | 12 | 1  | 22  | 23  | 2   | 3  | 1   | 1   |     |     | 212 | 167        | 25.8 | 6.9  | 67.3   | 100.0 |
| DF-B   | 139 | 9                     | 10 | 26 | 20 | 2  | 110 | 22 | 2  | 2  | 8   | 0   | 6   |    |     |     |     |     | 217 | 209        | 23.9 | 9.5  | 66.7   | 52.6  |
| SR-11C | 138 | 0                     | 10 | 25 | 23 | 2  | 112 | 25 | 25 | 1  | 14  |     | 3   |    |     |     |     |     | 240 | 226        | 22.5 | 4.5  | 73.0   | 100.0 |
| SR-11F | 138 | 0                     | 20 | 28 | 13 | 8  | 125 | 12 | 5  | 1  | 13  | 13  | 1   | 1  |     |     | 4   |     | 244 | 214        | 23.2 | 9.5  | 67.3   | 100.0 |
| SR-11D | 138 | 1                     | 22 | 29 | 13 | 0  | 102 | 23 | 12 | 4  | 17  | 5   | 5   |    |     |     | 11  |     | 244 | 211        | 20.8 | 11.4 | 67.8   | 95.7  |
| SR-11G | 137 | 0                     | 21 | 26 | 6  | 12 | 125 | 13 | 4  | 2  | 9   | 13  |     |    |     |     | 1   |     | 232 | 209        | 21.3 | 10.1 | 68.6   | 100.0 |
| SR-13A | 109 | 2                     | 37 | 20 | 9  | 0  | 129 | 10 | 1  | 1  | 4   | 12  | 3   |    |     | 4   |     |     | 232 | 216        | 13.9 | 18.8 | 67.3   | 94.9  |
| SR-11B | 109 | 2                     | 41 | 23 | 11 | 0  | 113 | 9  | 5  | 4  | 53  | 72  | 13  | 6  |     |     |     |     | 352 | 227        | 16.7 | 21.1 | 62.3   | 95.3  |
| SR-11H | 108 | 0                     | 17 | 9  | 4  | 2  | 205 | 1  | 0  | 0  | 10  | 6   |     |    |     |     | 4   |     | 258 | 238        | 6.3  | 7.1  | 86.6   | 100.0 |
| SR-11A | 107 | 0                     | 43 | 23 | 10 | 2  | 118 | 6  | 14 | 0  | 111 | 30  | 2   | 1  |     |     | 17  |     | 377 | 236        | 16.2 | 19.9 | 63.9   | 100.0 |
| SR-16G | 103 | 2                     | 34 | 29 | 4  | 0  | 133 | 13 | 3  | 6  | 5   | 24  | 5   | 7  |     | 3   |     |     | 268 | 239        | 15.1 | 16.5 | 68.3   | 94.4  |
| SR-16C | 101 | 0                     | 32 | 22 | 1  | 0  | 162 | 9  | 1  | 3  | 30  | 0   | 3   |    |     |     | 1   |     | 264 | 233        | 10.1 | 14.1 | 75.8   | 100.0 |
| OC-18A | 100 | 1                     | 55 | 31 | 2  | 0  | 112 | 14 | 0  | 1  | 2   | 102 | 5   | 1  |     | 5   |     |     | 331 | 227        | 15.3 | 26.0 | 58.6   | 98.2  |
| SR-16B | 97  | 1                     | 32 | 23 | 7  | 2  | 139 | 6  | 4  | 2  | 10  | 0   | 1   | 2  |     | 2   | 1   |     | 232 | 221        | 15.0 | 15.4 | 69.6   | 97.0  |
| SR-16F | 96  | 26                    | 50 | 82 | 0  | 1  | 30  | 21 | 7  | 12 | 2   | 22  | 1   |    |     |     |     |     | 254 | 230        | 38.2 | 35.0 | 26.7   | 65.8  |
| SR-16E | 93  | 26                    | 56 | 74 | 0  | 0  | 43  | 7  | 3  | 15 | 0   | 85  | 5   |    |     |     | 1   |     | 315 | 229        | 35.4 | 39.2 | 25.4   | 68.3  |
| A-13B  | 91  | 36                    | 31 | 48 | 6  | 2  | 48  | 22 | 4  | 2  | 11  |     | 1   |    | 1   |     |     |     | 212 | 201        | 28.4 | 34.0 | 37.6   | 46.3  |
| A-13C  | 87  | 25                    | 21 | 57 | 0  | 0  | 26  | 32 | 1  | 29 | 28  | 0   | 2   |    | 1   |     |     |     | 222 | 194        | 35.2 | 28.4 | 36.4   | 45.7  |
| SR-16D | 85  | 26                    | 61 | 79 | 0  | 0  | 33  | 23 | 2  | 17 | 15  | 1   | 2   |    |     |     |     |     | 259 | 243        | 35.3 | 38.8 | 25.9   | 70.1  |

Abbreviations: Kfs—K-feldspar, Pl—Plagioclase feldspar, Qm—monocrystalline quartz, Qc—polycrystalline quartz (chert), Lq—polycrystalline quartz (quartzite), Lv—lithic volcanic, Lm—lithic metamorphic, Ls—lithic sedimentary, Mi—mica, Mtx—undifferentiated matrix, Cal—calcite, Opq—opaque phase, Ep—epidote, Zrn—zircon, Cpx—clinopyroxene, Anm—phase with anomalous extinction, Alt—phase altered past optical recognition, Tot—total counts, Tc—total non-matrix clast counts, Qt—(Qm+Qc+Lq)/(total QtFL), F—(Kfs+Pl)/(total QtFL), L—(Lv+Lm+Ls)/(total QtFL), P/F—Pl/(Kfs+Pl).
